# Supplementary material for: Microbiology Meets Archaeology: Soil Microbial Communities Reveal Different Human Activities at Archaic Monte Iato (Sixth Century BC)
Source: PubMed Central journal article supplement (PMC5382179; doi:10.1007/s00248-016-0904-8), 2016-12-13

## **SUPPLEMENTARY MATERIAL**

### **Microbiology Meets Archaeology: Soil Microbial Communities Reveal Different Human Activities at Archaic Monte Iato (6<sup>th</sup> Cent. BC)**

Rosa Margesin\*, José A. Siles, Tomas Cajthaml, Birgit Öhlinger, Erich Kistler

\*Corresponding author: Rosa Margesin; e-mail: [Rosa.Margesin@uibk.ac.at](mailto:Rosa.Margesin@uibk.ac.at)

Journal: Microbial Ecology

The supplementary material includes Tables S1-S6 and Figures S1-S5

**Table S1** Relative oxidation rates of CLPP C-source families at the sampling locations A2, A3, A6 and A7. Values are expressed as AWCD. For each variable, data followed by different letters are significantly different ( $p \leq 0.05$ ).

| <b>C-source family</b>      | <b>A2</b>      | <b>A3</b>     | <b>A6</b>      | <b>A7</b>     |
|-----------------------------|----------------|---------------|----------------|---------------|
| Polymers                    | 0.38 <b>a</b>  | 0.30 <b>a</b> | 0.50 <b>a</b>  | 0.15 <b>a</b> |
| Carbohydrates               | 0.63 <b>a</b>  | 0.48 <b>a</b> | 1.02 <b>ab</b> | 1.58 <b>b</b> |
| Carboxylic and acetic acids | 1.16 <b>ab</b> | 1.63 <b>b</b> | 0.14 <b>a</b>  | 0.52 <b>a</b> |
| Amino acids                 | 0.66 <b>a</b>  | 0.61 <b>a</b> | 0.50 <b>a</b>  | 0.23 <b>a</b> |
| Amines/acides               | 0.16 <b>a</b>  | 0.22 <b>a</b> | 0.04 <b>a</b>  | 0.25 <b>a</b> |

**Table S2** Relative abundances (%) of most abundant non-culturable bacterial phyla and predominant subclasses of Actinobacteria, classes of Proteobacteria and subgroups of Acidobacteria at the four sampling locations. Data represent means. In each row, data followed by different letters are significantly different ( $p \leq 0.05$ ).

| <b>Taxa</b>                | <b>A2</b>      | <b>A3</b>      | <b>A6</b>      | <b>A7</b>      |
|----------------------------|----------------|----------------|----------------|----------------|
| Actinobacteria             | 30.10 <b>a</b> | 28.02 <b>a</b> | 42.11 <b>a</b> | 37.60 <b>a</b> |
| <i>Rubrobacteridae</i>     | 4.24 <b>a</b>  | 5.59 <b>a</b>  | 17.24 <b>b</b> | 8.69 <b>a</b>  |
| <i>Actinobacteridae</i>    | 4.77 <b>a</b>  | 7.25 <b>ab</b> | 8.65 <b>bc</b> | 10.35 <b>c</b> |
| <i>Acidimicrobidae</i>     | 0.39 <b>a</b>  | 0.32 <b>a</b>  | 1.12 <b>c</b>  | 0.69 <b>b</b>  |
| Proteobacteria             | 10.97 <b>a</b> | 13.71 <b>a</b> | 12.03 <b>a</b> | 16.36 <b>a</b> |
| <i>Alphaproteobacteria</i> | 2.48 <b>a</b>  | 5.25 <b>ab</b> | 8.56 <b>b</b>  | 10.26 <b>b</b> |
| <i>Deltaproteobacteria</i> | 3.30 <b>bc</b> | 4.49 <b>c</b>  | 1.35 <b>a</b>  | 2.10 <b>ab</b> |
| <i>Gammaproteobacteria</i> | 3.15 <b>a</b>  | 2.30 <b>a</b>  | 0.94 <b>a</b>  | 1.67 <b>a</b>  |
| <i>Betaproteobacteria</i>  | 1.93 <b>b</b>  | 1.57 <b>ab</b> | 1.02 <b>a</b>  | 2.19 <b>b</b>  |
| Acidobacteria              | 15.26 <b>b</b> | 16.83 <b>b</b> | 10.14 <b>a</b> | 10.15 <b>a</b> |
| Gp 6                       | 5.29 <b>bc</b> | 7.00 <b>c</b>  | 3.59 <b>ab</b> | 3.18 <b>a</b>  |
| Gp 4                       | 3.46 <b>a</b>  | 4.01 <b>a</b>  | 3.74 <b>a</b>  | 3.67 <b>a</b>  |
| Gp 7                       | 3.87 <b>b</b>  | 3.47 <b>b</b>  | 1.08 <b>a</b>  | 1.61 <b>a</b>  |
| Gp 18                      | 0.98 <b>a</b>  | 0.69 <b>a</b>  | 0.35 <b>a</b>  | 0.37 <b>a</b>  |
| Gp 16                      | 0.46 <b>a</b>  | 0.43 <b>a</b>  | 0.82 <b>a</b>  | 0.51 <b>a</b>  |
| Bacteroidetes              | 2.11 <b>a</b>  | 1.74 <b>a</b>  | 6.66 <b>a</b>  | 6.38 <b>a</b>  |
| Planctomycetes             | 5.50 <b>ab</b> | 7.57 <b>b</b>  | 4.19 <b>ab</b> | 2.87 <b>a</b>  |
| Nitrospirae                | 2.78 <b>b</b>  | 2.42 <b>ab</b> | 2.31 <b>a</b>  | 3.91 <b>a</b>  |
| Others                     | 6.49 <b>a</b>  | 4.86 <b>a</b>  | 5.51 <b>a</b>  | 5.90 <b>a</b>  |
| Unclassified               | 26.79 <b>a</b> | 24.85 <b>a</b> | 17.04 <b>a</b> | 16.83 <b>a</b> |

**Table S3** Identification and relative abundances of non-culturable bacterial OTUs with abundances >0.5% at the sampling locations A2, A3, A6 and A7.Data represent means. For each OTU, data followed by different letters are significantly different ( $p \leq 0.05$ ).

| OTU No. | OTU ID  | Phylum (Class)                                        | Order                         | A2              | A3              | A6              | A7              |
|---------|---------|-------------------------------------------------------|-------------------------------|-----------------|-----------------|-----------------|-----------------|
| 1       | OTU_002 | Actinobacteria ( <i>Actinobacteria</i> )              | <i>Actinomycetales</i>        | 20.07 <b>b</b>  | 10.21 <b>a</b>  | 8.30 <b>a</b>   | 11.42 <b>ab</b> |
| 2       | OTU_005 | Actinobacteria ( <i>Actinobacteria</i> )              | <i>Acidimicrobiales</i>       | 8.45 <b>ab</b>  | 4.90 <b>a</b>   | 21.25 <b>c</b>  | 15.40 <b>bc</b> |
| 3       | OTU_006 | Aquificae ( <i>Aquificae</i> )                        | <i>Aquificales</i>            | 20.31 <b>b</b>  | 26.38 <b>c</b>  | 1.07 <b>a</b>   | 2.23 <b>a</b>   |
| 4       | OTU_011 | Actinobacteria ( <i>Thermoleophila</i> )              | <i>Thermoleophilaceae</i>     | 2.42 <b>a</b>   | 4.88 <b>a</b>   | 20.15 <b>b</b>  | 22.55 <b>b</b>  |
| 5       | OTU_048 | Acidobacteria (Gp4)                                   | Gp4                           | 9.97 <b>a</b>   | 13.91 <b>a</b>  | 15.19 <b>a</b>  | 10.93 <b>a</b>  |
| 6       | OTU_003 | Proteobacteria ( <i>Alphaproteobacteria</i> )         | <i>Rhodospirillales</i>       | 1.78 <b>a</b>   | 4.83 <b>a</b>   | 20.78 <b>a</b>  | 22.61 <b>a</b>  |
| 7       | OTU_014 | Actinobacteria ( <i>Actinobacteria</i> )              | <i>Actinomycetales</i>        | 17.33 <b>b</b>  | 16.22 <b>b</b>  | 5.78 <b>a</b>   | 10.66 <b>ab</b> |
| 8       | OTU_015 | Actinobacteria ( <i>Actinobacteria</i> )              | <i>Gaiellales</i>             | 2.04 <b>a</b>   | 2.04 <b>a</b>   | 35.69 <b>c</b>  | 10.23 <b>b</b>  |
| 9       | OTU_025 | Acidobacteria (Gp6)                                   | Gp6                           | 15.24 <b>ab</b> | 24.85 <b>b</b>  | 5.74 <b>a</b>   | 4.18 <b>a</b>   |
| 10      | OTU_033 | Nitrospirae ( <i>Nitrospira</i> )                     | <i>Nitrospirales</i>          | 14.16 <b>a</b>  | 12.65 <b>a</b>  | 7.83 <b>a</b>   | 15.36 <b>a</b>  |
| 11      | OTU_019 | Actinobacteria ( <i>Actinobacteria</i> )              | <i>Acidimicrobiales</i>       | 13.46 <b>a</b>  | 12.66 <b>a</b>  | 10.90 <b>a</b>  | 12.98 <b>a</b>  |
| 12      | OTU_017 | Proteobacteria ( <i>Deltaproteobacteria</i> )         | <i>Syntrophobacterales</i>    | 14.86 <b>ab</b> | 18.66 <b>b</b>  | 6.58 <b>a</b>   | 9.90 <b>ab</b>  |
| 13      | OTU_008 | Proteobacteria ( <i>Alphaproteobacteria</i> )         | <i>Rhizobiales</i>            | 3.42 <b>a</b>   | 9.54 <b>a</b>   | 13.07 <b>ab</b> | 23.97 <b>b</b>  |
| 14      | OTU_035 | Aquificae ( <i>Aquificae</i> )                        | <i>Aquificales</i>            | 26.22 <b>b</b>  | 23.26 <b>b</b>  | 0.25 <b>a</b>   | 0.27 <b>a</b>   |
| 15      | OTU_021 | Proteobacteria ( <i>Deltaproteobacteria</i> )         | <i>Syntrophobacterales</i>    | 18.40 <b>b</b>  | 27.20 <b>c</b>  | 0.77 <b>a</b>   | 3.63 <b>a</b>   |
| 16      | OTU_128 | Actinobacteria ( <i>Actinobacteria</i> )              | <i>Gaiellales</i>             | 2.53 <b>a</b>   | 6.30 <b>a</b>   | 33.25 <b>b</b>  | 7.92 <b>a</b>   |
| 17      | OTU_026 | Bacteroidetes ( <i>Bacteroidetes_incertae_sedis</i> ) | <i>Ohtaekwangia</i>           | 16.51 <b>b</b>  | 14.34 <b>ab</b> | 5.44 <b>a</b>   | 13.71 <b>a</b>  |
| 18      | OTU_010 | Chloroflexi ( <i>Anaerolineae</i> )                   | <i>Anaerolineales</i>         | 1.85 <b>a</b>   | 1.20 <b>a</b>   | 31.64 <b>c</b>  | 15.31 <b>b</b>  |
| 19      | OTU_080 | Acidobacteria (Gp4)                                   | Gp4                           | 19.42 <b>b</b>  | 10.56 <b>ab</b> | 10.04 <b>a</b>  | 9.99 <b>a</b>   |
| 20      | OTU_190 | Actinobacteria ( <i>Actinobacteria</i> )              | <i>Actinomycetales</i>        | 1.32 <b>a</b>   | 0.94 <b>a</b>   | 23.66 <b>a</b>  | 24.08 <b>a</b>  |
| 21      | OTU_057 | Acidobacteria (Gp7)                                   | Gp7                           | 20.18 <b>b</b>  | 21.16 <b>b</b>  | 2.84 <b>a</b>   | 5.83 <b>a</b>   |
| 22      | OTU_050 | Acidobacteria (Gp6)                                   | Gp6                           | 17.45 <b>b</b>  | 21.57 <b>b</b>  | 3.38 <b>a</b>   | 7.60 <b>a</b>   |
| 23      | OTU_038 | Chloroflexi ( <i>Thermoflexia</i> )                   | <i>Thermoflexales</i>         | 11.94 <b>a</b>  | 24.29 <b>b</b>  | 4.42 <b>a</b>   | 9.35 <b>a</b>   |
| 24      | OTU_175 | Nitrospirae ( <i>Nitrospira</i> )                     | <i>Nitrospirales</i>          | 14.05 <b>a</b>  | 5.93 <b>a</b>   | 10.70 <b>a</b>  | 19.32 <b>a</b>  |
| 25      | OTU_023 | Actinobacteria ( <i>Actinobacteria</i> )              | <i>Actinomycetales</i>        | 1.82 <b>a</b>   | 11.64 <b>a</b>  | 9.44 <b>a</b>   | 27.10 <b>a</b>  |
| 26      | OTU_059 | Actinobacteria ( <i>Actinobacteria</i> )              | <i>Gaiellales</i>             | 3.72 <b>a</b>   | 6.37 <b>a</b>   | 31.17 <b>b</b>  | 8.74 <b>a</b>   |
| 27      | OTU_207 | Actinobacteria ( <i>Actinobacteria</i> )              | <i>Gaiellales</i>             | 26.70 <b>b</b>  | 17.63 <b>ab</b> | 1.30 <b>a</b>   | 4.37 <b>a</b>   |
| 28      | OTU_249 | Gemmatimonadetes ( <i>Gemmatimonadetes</i> )          | <i>Gemmatimonadales</i>       | 29.04 <b>a</b>  | 9.74 <b>a</b>   | 1.60 <b>a</b>   | 9.62 <b>a</b>   |
| 29      | OTU_027 | Bacteroidetes ( <i>Bacteroidetes_incertae_sedis</i> ) | <i>Ohtaekwangia</i>           | 0.18 <b>a</b>   | 0.12 <b>a</b>   | 1.11 <b>a</b>   | 48.60 <b>a</b>  |
| 30      | OTU_118 | Actinobacteria ( <i>Actinobacteria</i> )              | <i>Gaiellales</i>             | 13.95 <b>b</b>  | 14.78 <b>b</b>  | 4.49 <b>a</b>   | 16.78 <b>b</b>  |
| 31      | OTU_121 | Actinobacteria ( <i>Actinobacteria</i> )              | <i>Gaiellales</i>             | 1.08 <b>a</b>   | 1.74 <b>a</b>   | 34.09 <b>b</b>  | 13.09 <b>a</b>  |
| 32      | OTU_072 | Firmicutes ( <i>Clostridia</i> )                      | <i>Thermoanaerobacterales</i> | 6.82 <b>a</b>   | 22.79 <b>c</b>  | 5.22 <b>a</b>   | 15.17 <b>b</b>  |

**Table S4** Relative abundances (%) of non-culturable fungal phyla and the most abundant orders of Ascomycota, Basidiomycota and Zygomycota at the sampling locations A2, A3, A6 and A7. Data represent means. In each row, data followed by different letters are significantly different ( $p \leq 0.05$ ).

| <b>Taxa</b>           | <b>A2</b>       | <b>A3</b>      | <b>A6</b>      | <b>A7</b>       |
|-----------------------|-----------------|----------------|----------------|-----------------|
| Ascomycota            | 79.59 <b>ab</b> | 87.84 <b>b</b> | 46.62 <b>a</b> | 64.33 <b>ab</b> |
| <i>Pezizales</i>      | 0.69 <b>a</b>   | 0.37 <b>a</b>  | 35.05 <b>b</b> | 45.52 <b>c</b>  |
| <i>Pleosporales</i>   | 49.91 <b>b</b>  | 47.03 <b>b</b> | 0.38 <b>a</b>  | 0.32 <b>a</b>   |
| <i>Hypocreales</i>    | 19.40 <b>a</b>  | 23.80 <b>a</b> | 3.78 <b>a</b>  | 9.04 <b>a</b>   |
| <i>Helotiales</i>     | 0.51 <b>a</b>   | 8.81 <b>a</b>  | 0.04 <b>a</b>  | 1.63 <b>a</b>   |
| <i>Eurotiales</i>     | 0.49 <b>a</b>   | 0.28 <b>a</b>  | 0.62 <b>a</b>  | 3.81 <b>b</b>   |
| Basidiomycota         | 5.63 <b>a</b>   | 4.85 <b>a</b>  | 35.46 <b>b</b> | 3.70 <b>a</b>   |
| <i>Sebacinales</i>    | 0.02 <b>a</b>   | 0.03 <b>a</b>  | 2.50 <b>b</b>  | 2.43 <b>b</b>   |
| <i>Agaricales</i>     | 0.60 <b>a</b>   | 1.15 <b>a</b>  | 0.59 <b>a</b>  | 0.56 <b>a</b>   |
| Zygomycota            | 9.31 <b>a</b>   | 4.06 <b>a</b>  | 0.13 <b>a</b>  | 0.81 <b>a</b>   |
| <i>Mortierellales</i> | 9.31 <b>a</b>   | 4.06 <b>a</b>  | 0.13 <b>a</b>  | 0.81 <b>a</b>   |
| Glomeromycota         | 0.02 <b>a</b>   | 0.02 <b>a</b>  | 2.60 <b>a</b>  | 0.66 <b>a</b>   |
| Chytridiomycota       | 0.01 <b>a</b>   | 0.02 <b>a</b>  | 0.01 <b>a</b>  | 0.00 <b>a</b>   |
| Unclassified          | 5.44 <b>a</b>   | 3.22 <b>a</b>  | 15.17 <b>a</b> | 30.51 <b>a</b>  |

**Table S5** Identification and relative abundances (%) of non-culturable fungal OTUs with abundance >0.5% at the sampling locations A2, A3, A6 and A7. Data represent means. For each OTU, data followed by different letters are significantly different ( $p \leq 0.05$ ).

| OTU No. | OTU ID  | Phylum (Class)                             | Order                        | A2             | A3              | A6             | A7             |
|---------|---------|--------------------------------------------|------------------------------|----------------|-----------------|----------------|----------------|
| 1       | OTU_004 | Ascomycota ( <i>Dothideomycetes</i> )      | <i>Pleosporales</i>          | 31.39 <b>b</b> | 18.35 <b>ab</b> | 0.12 <b>a</b>  | 0.14 <b>a</b>  |
| 2       | OTU_002 | Ascomycota ( <i>Pezizomycetes</i> )        | <i>Pezizales</i>             | 0.30 <b>a</b>  | 0.42 <b>a</b>   | 10.45 <b>a</b> | 38.82 <b>b</b> |
| 3       | OTU_003 | Ascomycota ( <i>Sordariomycetes</i> )      | <i>Hypocreales</i>           | 15.10 <b>a</b> | 23.47 <b>a</b>  | 2.60 <b>a</b>  | 8.83 <b>a</b>  |
| 4       | OTU_007 | Basidiomycota ( <i>Tremellomycetes</i> )   | <i>Tremellales</i>           | 0.31 <b>a</b>  | 0.27 <b>a</b>   | 49.17 <b>b</b> | 0.26 <b>a</b>  |
| 5       | OTU_006 | Ascomycota ( <i>Dothideomycetes</i> )      | <i>Pleosporales</i>          | 0.19 <b>a</b>  | 49.48 <b>a</b>  | 0.12 <b>a</b>  | 0.21 <b>a</b>  |
| 6       | OTU_005 | Basidiomycota ( <i>Agaricomycetes</i> )    | <i>Polyporales</i>           | 0.19 <b>a</b>  | 0.32 <b>a</b>   | 4.02 <b>a</b>  | 45.47 <b>b</b> |
| 7       | OTU_008 | Ascomycota (Ascomycota unidentified)       | Ascomycota unidentified 1    | 0.20 <b>a</b>  | 0.28 <b>a</b>   | 49.20 <b>a</b> | 0.31 <b>a</b>  |
| 8       | OTU_010 | Basidiomycota ( <i>Agaricomycetes</i> )    | <i>Agaricales</i>            | 0.19 <b>a</b>  | 0.20 <b>a</b>   | 0.27 <b>a</b>  | 49.34 <b>a</b> |
| 9       | OTU_011 | Ascomycota ( <i>Dothideomycetes</i> )      | <i>Pleosporales</i>          | 28.30 <b>a</b> | 20.97 <b>a</b>  | 0.37 <b>a</b>  | 0.37 <b>a</b>  |
| 10      | OTU_014 | Ascomycota ( <i>Pezizomycetes</i> )        | <i>Pezizales</i>             | 0.13 <b>a</b>  | 0.14 <b>a</b>   | 47.28 <b>a</b> | 2.46 <b>a</b>  |
| 12      | OTU_026 | Basidiomycota ( <i>Agaricomycetes</i> )    | <i>Sebacinales</i>           | 0.14 <b>a</b>  | 0.11 <b>a</b>   | 35.84 <b>a</b> | 13.92 <b>a</b> |
| 13      | OTU_012 | Ascomycota ( <i>Leotiomycetes</i> )        | <i>Helotiales</i>            | 0.31 <b>a</b>  | 49.32 <b>b</b>  | 0.19 <b>a</b>  | 0.18 <b>a</b>  |
| 14      | OTU_013 | Ascomycota ( <i>Pezizomycetes</i> )        | <i>Pezizales</i>             | 0.31 <b>a</b>  | 0.18 <b>a</b>   | 48.88 <b>a</b> | 0.63 <b>a</b>  |
| 15      | OTU_016 | Basidiomycota ( <i>Agaricomycetes</i> )    | <i>Cantharellales</i>        | 0.11 <b>a</b>  | 0.23 <b>a</b>   | 49.43 <b>a</b> | 0.23 <b>a</b>  |
| 16      | OTU_015 | Ascomycota ( <i>Eurotiomycetes</i> )       | <i>Eurotiales</i>            | 0.17 <b>a</b>  | 0.25 <b>a</b>   | 5.75 <b>a</b>  | 43.83 <b>b</b> |
| 17      | OTU_023 | Basidiomycota ( <i>Agaricomycetes</i> )    | <i>Agaricales</i>            | 49.34 <b>a</b> | 0.16 <b>a</b>   | 0.28 <b>a</b>  | 0.23 <b>a</b>  |
| 18      | OTU_019 | Zygomycota (Incertae sedis 10)             | <i>Mortierellales</i>        | 48.06 <b>a</b> | 1.06 <b>a</b>   | 0.29 <b>a</b>  | 0.59 <b>a</b>  |
| 19      | OTU_020 | Zygomycota (Incertae sedis 10)             | <i>Mortierellales</i>        | 35.48 <b>a</b> | 11.37 <b>a</b>  | 0.32 <b>a</b>  | 2.84 <b>a</b>  |
| 20      | OTU_017 | Ascomycota ( <i>Leotiomycetes</i> )        | <i>Helotiales</i>            | 0.12 <b>a</b>  | 0.22 <b>a</b>   | 0.36 <b>a</b>  | 49.30 <b>b</b> |
| 21      | OTU_021 | Glomeromycota (Glomeromycota_unidentified) | Glomeromycota unidentified 1 | 0.21 <b>a</b>  | 0.23 <b>a</b>   | 39.05 <b>b</b> | 10.51 <b>a</b> |
| 22      | OTU_027 | Fungi_unidentified (Fungi unidentified 1)  | Fungi unidentified 1         | 49.13 <b>a</b> | 0.24 <b>a</b>   | 0.46 <b>a</b>  | 0.17 <b>a</b>  |
| 23      | OTU_022 | Ascomycota ( <i>Sordariomycetes</i> )      | <i>Hypocreales</i>           | 6.47 <b>a</b>  | 28.34 <b>b</b>  | 5.85 <b>a</b>  | 9.34 <b>a</b>  |
| 24      | OTU_060 | Ascomycota ( <i>Dothideomycetes</i> )      | <i>Pleosporales</i>          | 36.25 <b>a</b> | 13.03 <b>a</b>  | 0.39 <b>a</b>  | 0.33 <b>a</b>  |
| 25      | OTU_044 | Basidiomycota ( <i>Tremellomycetes</i> )   | <i>Cystofilobasidiales</i>   | 0.10 <b>a</b>  | 0.00 <b>a</b>   | 49.70 <b>a</b> | 0.20 <b>a</b>  |
| 26      | OTU_031 | Ascomycota ( <i>Pezizomycetes</i> )        | <i>Pezizales</i>             | 0.14 <b>a</b>  | 0.24 <b>a</b>   | 49.29 <b>a</b> | 0.34 <b>a</b>  |
| 27      | OTU_033 | Ascomycota ( <i>Leotiomycetes</i> )        | <i>Helotiales</i>            | 0.14 <b>a</b>  | 0.32 <b>a</b>   | 0.39 <b>a</b>  | 49.16 <b>b</b> |
| 28      | OTU_036 | Ascomycota ( <i>Sordariomycetes</i> )      | <i>Hypocreales</i>           | 42.25 <b>a</b> | 7.03 <b>a</b>   | 0.40 <b>a</b>  | 0.32 <b>a</b>  |
| 29      | OTU_049 | Ascomycota (Ascomycota unidentified)       | Ascomycota unidentified 1    | 40.47 <b>a</b> | 8.84 <b>a</b>   | 0.22 <b>a</b>  | 0.47 <b>a</b>  |
| 30      | OTU_028 | Zygomycota (Incertae sedis 10)             | <i>Mortierellales</i>        | 31.98 <b>b</b> | 10.57 <b>a</b>  | 0.11 <b>a</b>  | 7.34 <b>a</b>  |
| 31      | OTU_029 | Ascomycota ( <i>Sordariomycetes</i> )      | <i>Hypocreales</i>           | 32.83 <b>a</b> | 9.36 <b>a</b>   | 1.69 <b>a</b>  | 6.12 <b>a</b>  |
| 32      | OTU_037 | Ascomycota ( <i>Dothideomycetes</i> )      | <i>Pleosporales</i>          | 44.79 <b>a</b> | 4.79 <b>a</b>   | 0.26 <b>a</b>  | 0.15 <b>a</b>  |
| 33      | OTU_053 | Ascomycota ( <i>Sordariomycetes</i> )      | <i>Hypocreales</i>           | 0.91 <b>a</b>  | 45.97 <b>b</b>  | 0.84 <b>a</b>  | 2.28 <b>a</b>  |
| 34      | OTU_034 | Ascomycota (Ascomycota unidentified)       | Ascomycota unidentified 1    | 29.14 <b>b</b> | 13.56 <b>a</b>  | 6.30 <b>a</b>  | 0.99 <b>a</b>  |
| 35      | OTU_032 | Ascomycota ( <i>Dothideomycetes</i> )      | Dothideomycetes unidentified | 48.89 <b>a</b> | 0.40 <b>a</b>   | 0.36 <b>a</b>  | 0.36 <b>a</b>  |
| 36      | OTU_038 | Basidiomycota ( <i>Agaricomycetes</i> )    | <i>Sebacinales</i>           | 0.19 <b>a</b>  | 0.14 <b>a</b>   | 6.60 <b>a</b>  | 43.07 <b>a</b> |
| 37      | OTU_030 | Zygomycota (Incertae sedis 10)             | <i>Mortierellales</i>        | 0.43 <b>a</b>  | 47.42 <b>b</b>  | 1.00 <b>a</b>  | 1.15 <b>a</b>  |
| 38      | OTU_052 | Ascomycota (Incertae sedis 14)             | Incertae sedis 15            | 0.29 <b>a</b>  | 24.35 <b>a</b>  | 19.23 <b>a</b> | 6.12 <b>a</b>  |

**Table S6** Identification of the culturable bacterial OTUs and their distribution at the sites A2, A3, A6, and A7.

| OTU no. | OTU Id | Isolate Id | GenBank access. no. | Closest relative Eztaxon match (GenBank accession no.), % similarity | Phylum (order)                                | Number of isolates per site |    |    |    |
|---------|--------|------------|---------------------|----------------------------------------------------------------------|-----------------------------------------------|-----------------------------|----|----|----|
|         |        |            |                     |                                                                      |                                               | A2                          | A3 | A6 | A7 |
| 1       | OTU_01 | A3.51      | KX028737            | <i>Arthrobacter oxydans</i> DSM 20119(T) (X83408), 100.00            | Actinobacteria ( <i>Actinomycetales</i> )     | 35                          | 34 | 6  | 10 |
| 2       | OTU_02 | A7.30      | KX028738            | <i>Arthrobacter nicotinovorans</i> DSM 420(T) (X80743), 97.51        | Actinobacteria ( <i>Actinomycetales</i> )     | 0                           | 4  | 8  | 2  |
| 3       | OTU_03 | A7.07      | KX028739            | <i>Nocardioides albus</i> KCTC 9186(T) (AF004988), 99.51             | Actinobacteria ( <i>Propionibacteriales</i> ) | 3                           | 1  | 8  | 2  |
| 4       | OTU_04 | A7.09      | KX028740            | <i>Bacillus simplex</i> NBRC 15720(T) (AB363738), 100.00             | Firmicutes ( <i>Bacillales</i> )              | 0                           | 2  | 1  | 9  |
| 5       | OTU_05 | A7.49      | KX028741            | <i>Agromyces humatus</i> CD5(T) (AY618216), 97.64                    | Actinobacteria ( <i>Actinomycetales</i> )     | 1                           | 2  | 3  | 4  |
| 6       | OTU_06 | A6.48      | KX028742            | <i>Paenibacillus pectinilyticus</i> RCB-08(T) (EU391157), 99.14      | Firmicutes ( <i>Bacillales</i> )              | 1                           | 0  | 6  | 2  |
| 7       | OTU_07 | A7.50      | KX028743            | <i>Promicromonospora xylanilytica</i> YIM 61515(T) (FJ214352), 99.50 | Actinobacteria ( <i>Actinomycetales</i> )     | 0                           | 0  | 3  | 2  |
| 8       | OTU_08 | A6.06      | KX028744            | <i>Variovorax soli</i> GH 9-3(T) (DQ432053), 99.18                   | Proteobacteria ( <i>Burkholderiales</i> )     | 0                           | 0  | 4  | 0  |
| 9       | OTU_09 | A7.29      | KX028745            | <i>Pseudomonas lini</i> CFBP 5737(T) (AY035996), 99.00               | Proteobacteria ( <i>Pseudomonadales</i> )     | 0                           | 0  | 1  | 2  |
| 10      | OTU_10 | A7.36      | KX028746            | <i>Agromyces neolithicus</i> 23-23(T) (AY507128), 97.99              | Actinobacteria ( <i>Actinomycetales</i> )     | 0                           | 0  | 1  | 2  |
| 11      | OTU_11 | A7.45      | KX028747            | <i>Streptomyces sioyaensis</i> NRRL B-5408(T) (DQ026654), 99.69      | Actinobacteria ( <i>Streptomycetales</i> )    | 0                           | 0  | 2  | 1  |
| 12      | OTU_12 | A7.51      | KX028748            | <i>Microbacterium flavescens</i> DSM 20643(T) (Y17232), 98.31        | Actinobacteria ( <i>Actinomycetales</i> )     | 0                           | 0  | 0  | 3  |
| 13      | OTU_13 | A6.41      | KX028749            | <i>Streptomyces puniceus</i> NRRL ISP-5058(T) (JOAD01000551), 98.30  | Actinobacteria ( <i>Streptomycetales</i> )    | 0                           | 0  | 2  | 0  |
| 14      | OTU_14 | A7.33      | KX028750            | <i>Agromyces ramosus</i> DSM 43045(T) (X77447), 97.76                | Actinobacteria ( <i>Actinomycetales</i> )     | 0                           | 0  | 1  | 1  |
| 15      | OTU_15 | A2.05      | KX028751            | <i>Bosea eneeae</i> 34614(T) (AF288300), 99.52                       | Proteobacteria ( <i>Rhizobiales</i> )         | 2                           | 0  | 0  | 0  |
| 16      | OTU_16 | A7.08      | KX028752            | <i>Paenibacillus endophyticus</i> PECAE04(T) (KC447384), 99.08       | Firmicutes ( <i>Bacillales</i> )              | 0                           | 0  | 1  | 1  |
| 17      | OTU_17 | A6.22      | KX028753            | <i>Paenibacillus algorifonticola</i> XJ259(T) (GQ383922), 99.68      | Firmicutes ( <i>Bacillales</i> )              | 0                           | 0  | 2  | 0  |
| 18      | OTU_18 | A3.09      | KX028754            | <i>Arthrobacter oryzae</i> KV-651(T) (AB279889), 97.90               | Actinobacteria ( <i>Actinomycetales</i> )     | 0                           | 1  | 0  | 0  |
| 19      | OTU_19 | A3.30      | KX028755            | <i>Fictibacillus phosphorivorans</i> Ca7T(T) (JX258924), 99.48       | Firmicutes ( <i>Bacillales</i> )              | 0                           | 1  | 0  | 0  |
| 20      | OTU_20 | A3.16      | KX028756            | <i>Bacillus ginsengisoli</i> DCY53(T) (HQ224517), 98.48              | Firmicutes ( <i>Bacillales</i> )              | 0                           | 1  | 0  | 0  |
| 21      | OTU_21 | A7.32      | KX028757            | <i>Phyllobacterium brassicacearum</i> STM 196(T) (AY785319), 97.27   | Proteobacteria ( <i>Rhizobiales</i> )         | 0                           | 0  | 0  | 1  |
| 22      | OTU_22 | A7.48      | KX028758            | <i>Paenibacillus pectinilyticus</i> RCB-08(T) (EU391157), 99.14      | Firmicutes ( <i>Bacillales</i> )              | 0                           | 0  | 0  | 1  |
| 23      | OTU_23 | A7.24      | KX028759            | <i>Ensifer garamanticus</i> ORS 1400(T) (AY500255), 99.32            | Proteobacteria ( <i>Rhizobiales</i> )         | 0                           | 0  | 0  | 1  |
| 24      | OTU_24 | A2.46      | KX028760            | <i>Aeromicrobium panaciterrae</i> Gsoil 161(T) (AB245387), 99.74     | Actinobacteria ( <i>Propionibacteriales</i> ) | 1                           | 0  | 0  | 0  |
| 25      | OTU_25 | A2.38      | KX028761            | <i>Candidatus Saccharimonas aalborgensis</i> (CP005957), 91.24       | Saccharibacteria ( <i>Saccharimonas</i> )     | 1                           | 0  | 0  | 0  |
| 26      | OTU_26 | A7.41      | KX028762            | <i>Paenibacillus alginolyticus</i> DSM5050(T) (D78465), 99.68        | Firmicutes ( <i>Bacillales</i> )              | 0                           | 0  | 0  | 1  |
| 27      | OTU_27 | A6.23      | KX028763            | <i>Microbacterium flavescens</i> DSM 20643(T) (Y17232), 94.70        | Actinobacteria ( <i>Actinomycetales</i> )     | 0                           | 0  | 1  | 0  |

**Fig. S1** Cult precinct south of Peristyle House I, 500–460 B.C. (**A**, Aphrodite-Temple; **B**, Late Archaic House; **C**, native building (Institute of Archaeologies, University of Innsbruck).

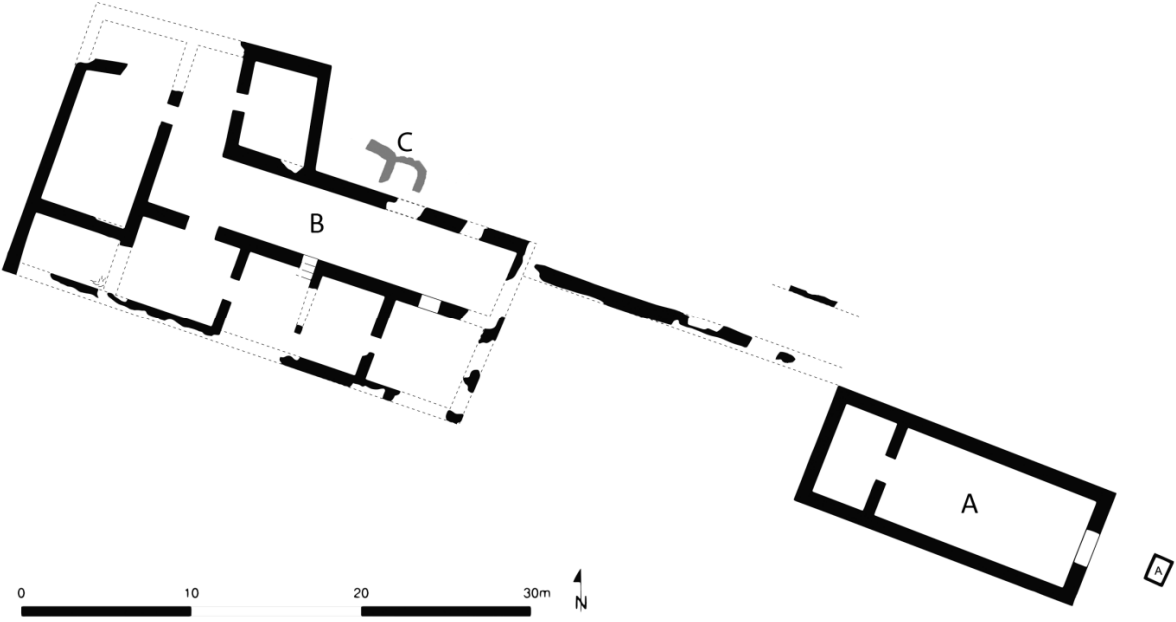



**Fig. S2** Rarefaction curves for non-culturable bacterial communities found at the sampling locations A2, A3, A6 and A7.

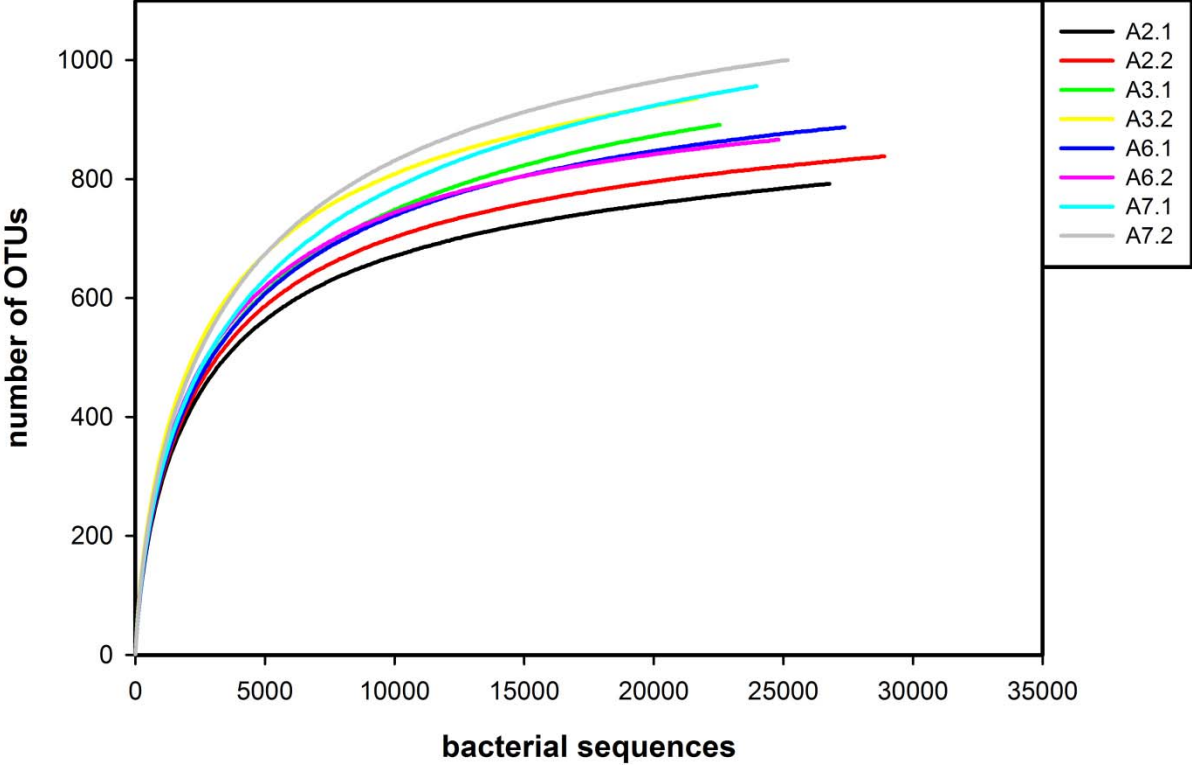

**Fig. S3** Relative abundance (%) of non-culturable bacterial (a) and fungal (b) classes found at the sampling locations A2, A3, A6 and A7.

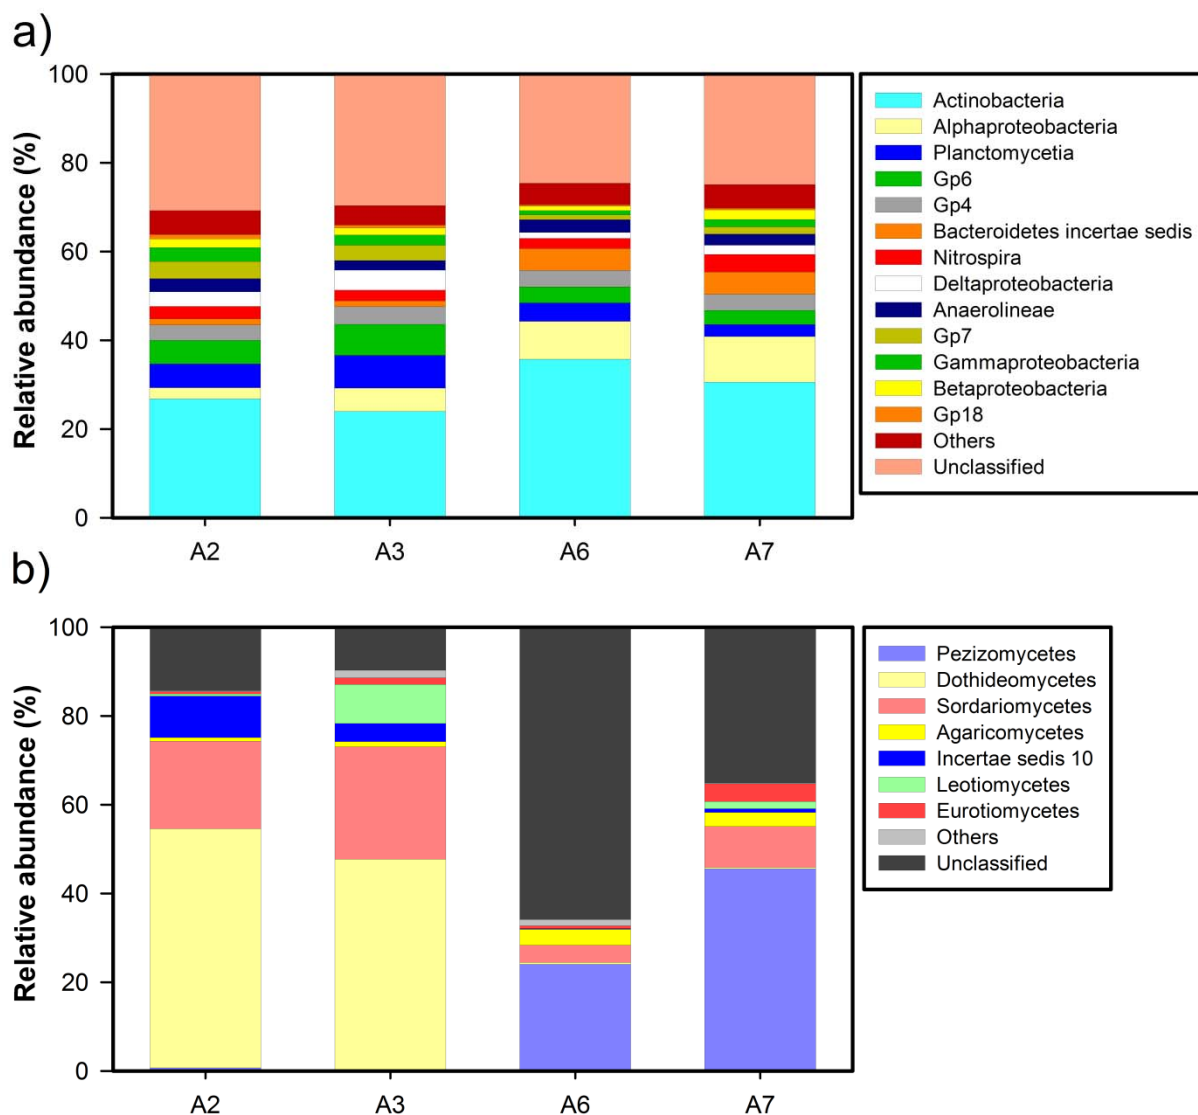

**Fig. S4** Rarefaction curves for non-culturable fungal communities found at the sampling locations A2, A3, A6 and A7.

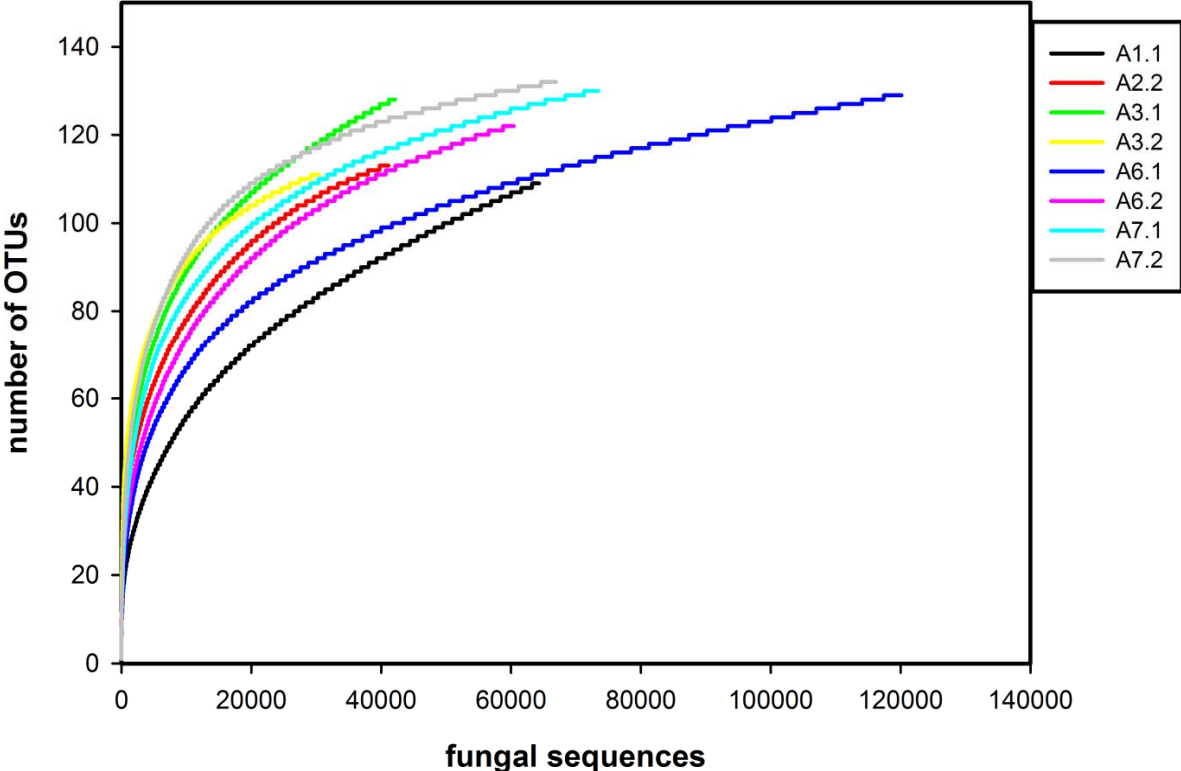

**Fig. S5** Cluster analysis based on the distribution of culturable bacterial OTUs at the four sampling locations (A2, A3, A6, A7), generated by UPGMA. Values at branches are AU (approximately unbiased) p-values (left), BP (bootstrap probability) values (right), and cluster labels (bottom).

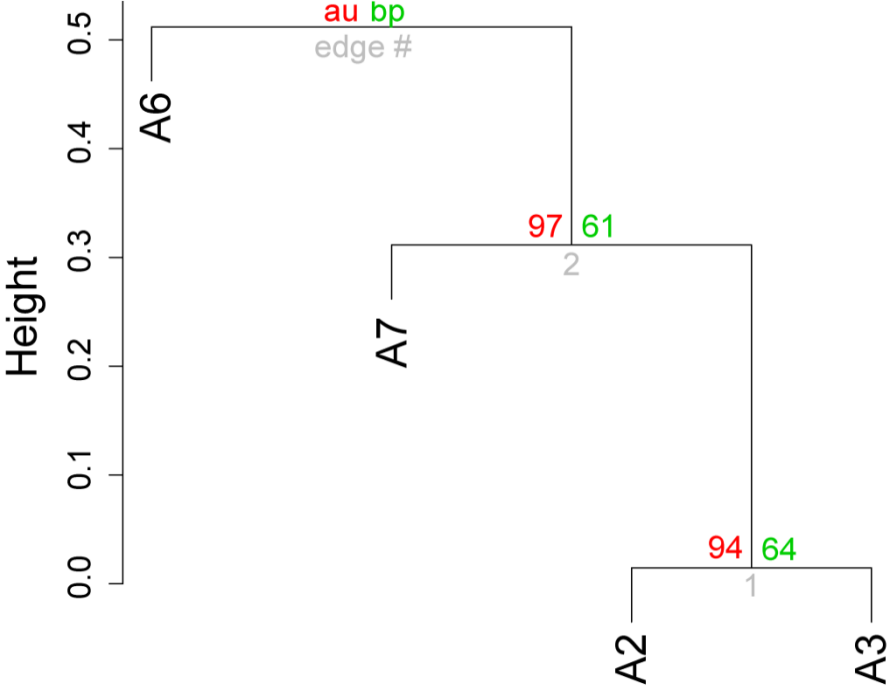

Supplement: 248_2016_904_MOESM1_ESM.pdf [file 248_2016_904_MOESM1_ESM.pdf]
